# Supplementary material
Source: Springer Nature journal article supplement (https://www.springermedizin.de/resource/supplementary/13023_2009_324_MOESM9_ESM.pdf/9642112)
Supplement: MOESM9 [file 9642112]

**Before surgery**

PE with FFP (60-75 ml/kg) within 4-6 h before graft reperfusion  
If hemodialysis, PE after dialysis

**During surgery**

FFP  $\geq$  10-20 ml/kg

**After surgery**

PE with FFP (60-75 ml/kg)  
daily  $\geq$  5 days  
5 / week x 2 weeks  
3 / week x 2 weeks  
then tapered on a case by case basis
